# Supplementary material for: Development of a pediatric differentiated thyroid carcinoma registry within the EuRRECa project: rationale and protocol
Source: PubMed Central journal article supplement — Endocr Connect. 2023 Feb 3;12(3):e220306. doi: 10.1530/EC-22-0306 (PMC9986407; doi:10.1530/ec-22-0306), 2023-02-03
Supplement: supplementary_table_1.pdf [file supplementary_table_1.pdf]

## **APPENDIX A – Management Team**

Prof. Dr. S. Faisal Ahmed, Pediatric Endocrinologist, Developmental Endocrinology Research Group, Royal Hospital for Children, University of Glasgow, Glasgow, United Kingdom.

Dr. Sarah C. Clement, Pediatrician in Training, Clinical Epidemiologist, Department of Pediatrics, Emma Children's Hospital, Amsterdam University Medical Centers, University of Amsterdam, Amsterdam, The Netherlands.

Prof. Dr. Thera P. Links, Endocrinologist, Department of Endocrinology, University Medical Center Groningen, University of Groningen, Groningen, The Netherlands.

Dr. Ana Priego, Pediatric Endocrinologist, Department of Medicine, Division of Endocrinology, Leiden, University medical Center, Leiden, The Netherlands.

Dr. Hanneke M. van Santen, Associate Professor, Pediatric Endocrinologist, Wilhelmina Children's Hospital and Princess Maxima Center, Utrecht, the Netherlands.

Dr. W. Edward Visser, Endocrinologist, Academic Center For Thyroid Disease, Department of Internal Medicine, Erasmus Medical Center, Rotterdam, The Netherlands.
