# Supplementary material for: Development of a pediatric differentiated thyroid carcinoma registry within the EuRRECa project: rationale and protocol
Source: PubMed Central journal article supplement — Endocr Connect. 2023 Feb 3;12(3):e220306. doi: 10.1530/EC-22-0306 (PMC9986407; doi:10.1530/ec-22-0306), 2023-02-03
Supplement: supplementary_table_2.pdf [file supplementary_table_2.pdf]

## **APPENDIX B** – Expert Working Group

Dr. Domenico Albano, Nuclear Medicine Physician, Department of Nuclear Medicine, University of Brescia and Spedali Civili of Brescia, Brescia, Italy.

Dr. Sarah C. Clement, Pediatrician in training, Clinical Epidemiologist, Department of Pediatrics, Emma Children's Hospital, Amsterdam University Medical Centers, University of Amsterdam, Amsterdam, The Netherlands.

Prof. Dr. Hedi L. Claahsen-van der Grinten, Pediatric Endocrinologist, Department of Pediatrics, Radboud University Medical Center, Amalia Children's Hospital, Nijmegen, The Netherlands

Dr. Agnieszka Czarniecka, Associate Professor, Endocrine Surgeon, The Oncologic and Reconstructive Surgery Clinic, M. Skłodowska-Curie National Research Institute of Oncology Gliwice Branch, Gliwice, Poland.

Dr. Renuka P. Dias, Pediatric Endocrinologist, Department of Paediatric Endocrinology and Diabetes, Birmingham Children's Hospital NHS Foundation Trust, Birmingham, United Kingdom.

Dr. Miranda P. Dierselhuis, Pediatric Oncologist, Princess Maxima Center, Utrecht, the Netherlands.

Dr. Iveta Dzivite-Krisane, Associate Professor, Pediatric Endocrinologist, Department of Pediatric Endocrinology, Children's Clinical University Hospital, Riga, Latvia

Dr. Rossella Elisei, Associate Professor, Endocrinologist, Endocrine Unit, Department of Clinical and Experimental Medicine, University of Pisa, Pisa.

Dr. Amparo Garcia-Burillo, Nuclear Medicine Physician, Medicine Department, Vall d'Hebron University Hospital, Barcelona 08035, Catalunya, Spain.

Dr. Louise Izatt, Consultant in Clinical Genetics, Department of Clinical Genetics, Guy's and St Thomas' NHS Foundation Trust, London, United Kingdom.

Prof. Dr. Christina Kanaka-Gabentein, Pediatric Endocrinologist, Head of Diabetes Center and Division of Endocrinology, Diabetes, and Metabolism, First Department of Pediatrics, National and Kapodistrian University of Athens, Aghia Sophia Children's Hospital, Athens, Greece.

Prof. Dr. Heiko Krude, Pediatric Endocrinologist, Institute of Experimental Pediatric Endocrinology, Charité - Universitätsmedizin, Berlin, Germany.

Dr. Livia Lamartina, Internal Medicine Physician, Department of Endocrine Oncology, Gustave Roussy, 94805 Villejuif, France.

Drs. Chantal A. Lebbink, PhD Student, Wilhelmina Children's Hospital and Princess Maxima Center, Utrecht, the Netherlands.

Prof. Dr. Thera P. Links, Endocrinologist, Department of Endocrinology, University Medical Center Groningen, University of Groningen, Groningen, The Netherlands.

Prof. Dr. Kerstin Lorenz, Endocrine Surgeon, Department of Visceral, Vascular and Endocrine Surgery, Martin Luther University Halle-Wittenberg, Halle (Saale), Germany.

Prof. Dr. Markus Luster, Nuclear Medicine Physician, Department of Nuclear Medicine, University Hospital Marburg, Marburg, Germany.

Dr. Rūta Navardauskaitė, Pediatric Endocrinologist, Institute of Endocrinology, Lithuanian University of Health Sciences, Kaunas, Lithuania

Dr. Montserrat Negre Busó, Nuclear Medicine Physician, Nuclear Medicine Service - Institut de diagnòstic per la Imatge. Hospital Universitari de Girona Dr. Josep Trueta, Spain.

Dr. Kate Newbold, Consultant Clinical Oncologist, Thyroid Therapy Unit, The Royal Marsden NHS Foundation Trust, Hospital, London, United Kingdom.

Prof. Dr. Robin P. Peeters, Endocrinologist, Academic Center For Thyroid Disease, Department of Internal Medicine, Erasmus Medical Center, Rotterdam, The Netherlands.

Dr. Gabriella Pellegriti, Endocrinologist, Endocrinology Division, Garibaldi-Nesima Medical Center, Catania, Italy.

Dr. Arnaldo Piccardo, Nuclear Medicine Physician, Department of Nuclear Medicine, EO Ospedali Galliera, Genoa, Italy.

Dr. Antje Redlich, Doctor of Medicine, Pediatric Oncology Department, Otto von Guericke University Children's Hospital, Magdeburg, Germany.

Dr. Hanneke M. van Santen, Associate Professor, Pediatric Endocrinologist, Wilhelmina Children's Hospital and Princess Maxima Center, Utrecht, the Netherlands.

Dr. Luisa de Sanctis, Associate Professor, Pediatric Endocrinologist, Regina Margherita Children Hospital - Department of Public Health and Pediatric Sciences, University of Torino, Torino, Italy.

Prof. Dr. Manuel Sobrinho Simões, Pathologist, University Hospital of São João, Medical Faculty and Institute of Molecular Pathology and Immunology, University of Porto, Porto, Portugal.

Prof. Dr. A.S. Paul van Trotsenburg, Pediatric Endocrinologist, Department of Pediatric Endocrinology, Emma Children's Hospital, Amsterdam University Medical Centers, University of Amsterdam, Amsterdam, The Netherlands.

Prof. Dr. Frederik A. Verburg, Nuclear Medicine Physician, Department of Radiology and Nuclear Medicine, Erasmus University Medical Center, Rotterdam, The Netherlands.

Prof. Dr. Menno Vriens, Endocrine surgeon, Department of Endocrine Surgery, University Medical Center Utrecht, Utrecht, The Netherlands.
